# Supplementary material for: Neural signatures of emotion regulation
Source: PubMed Central journal article supplement (PMC10799868; doi:10.1038/s41598-024-52203-3), 2024-01-20
Supplement: 41598_2024_52203_MOESM1_ESM.pdf [file 41598_2024_52203_MOESM1_ESM.pdf]

## Supplementary Figures – Neural Signatures of Emotion Regulation

Jared Rieck, Julia Wrobel, Antonio R. Porras, Kateri McRae, Joshua L. Gowin

### *Harmonization of Voxel Distributions*

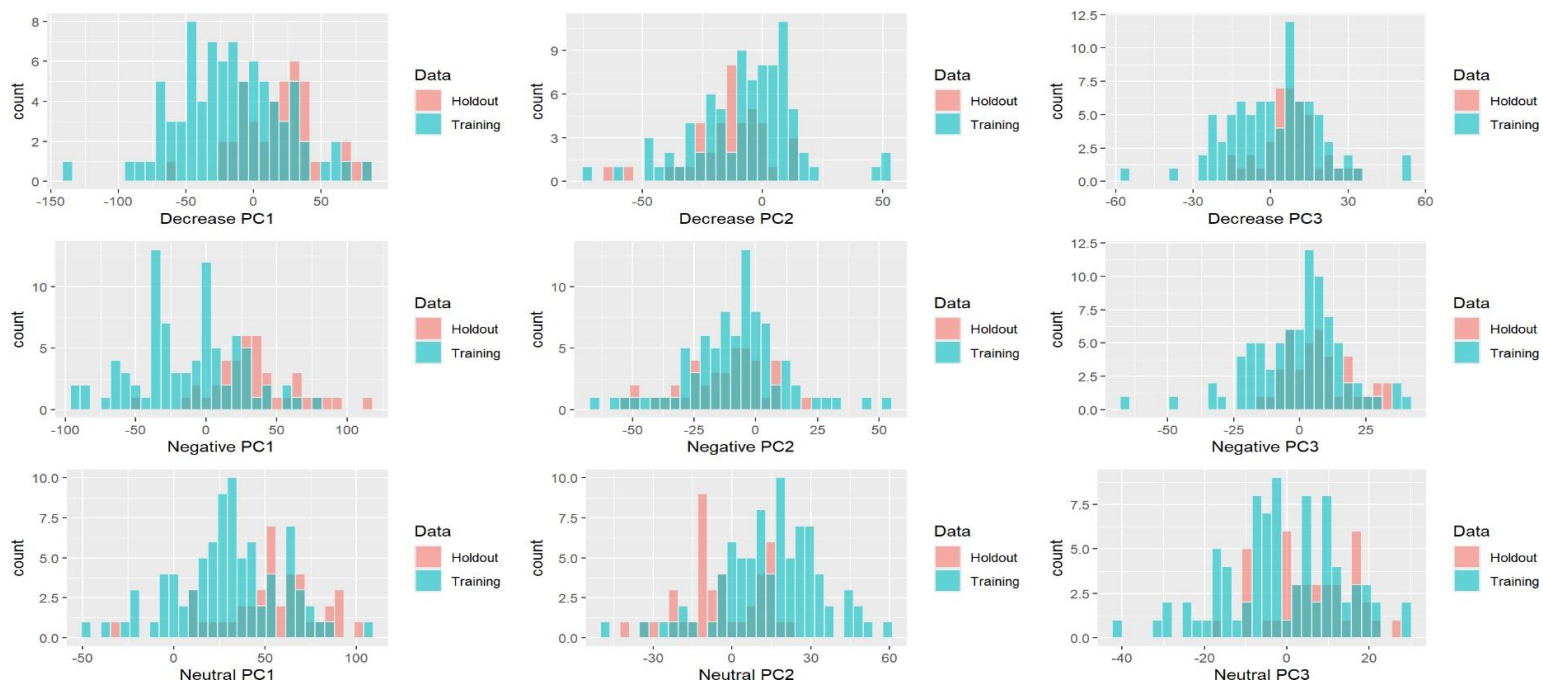

**Figure S1: PC Distributions- Pre CovBat**

Clear distributional differences are observed in the first three principal components between the training sample (blue) and holdout sample (red) prior to harmonization. The magnitude of distributional differences is modulated by class, with greater similarity observed for the negative class in PC2 and for the decrease class in PC3.

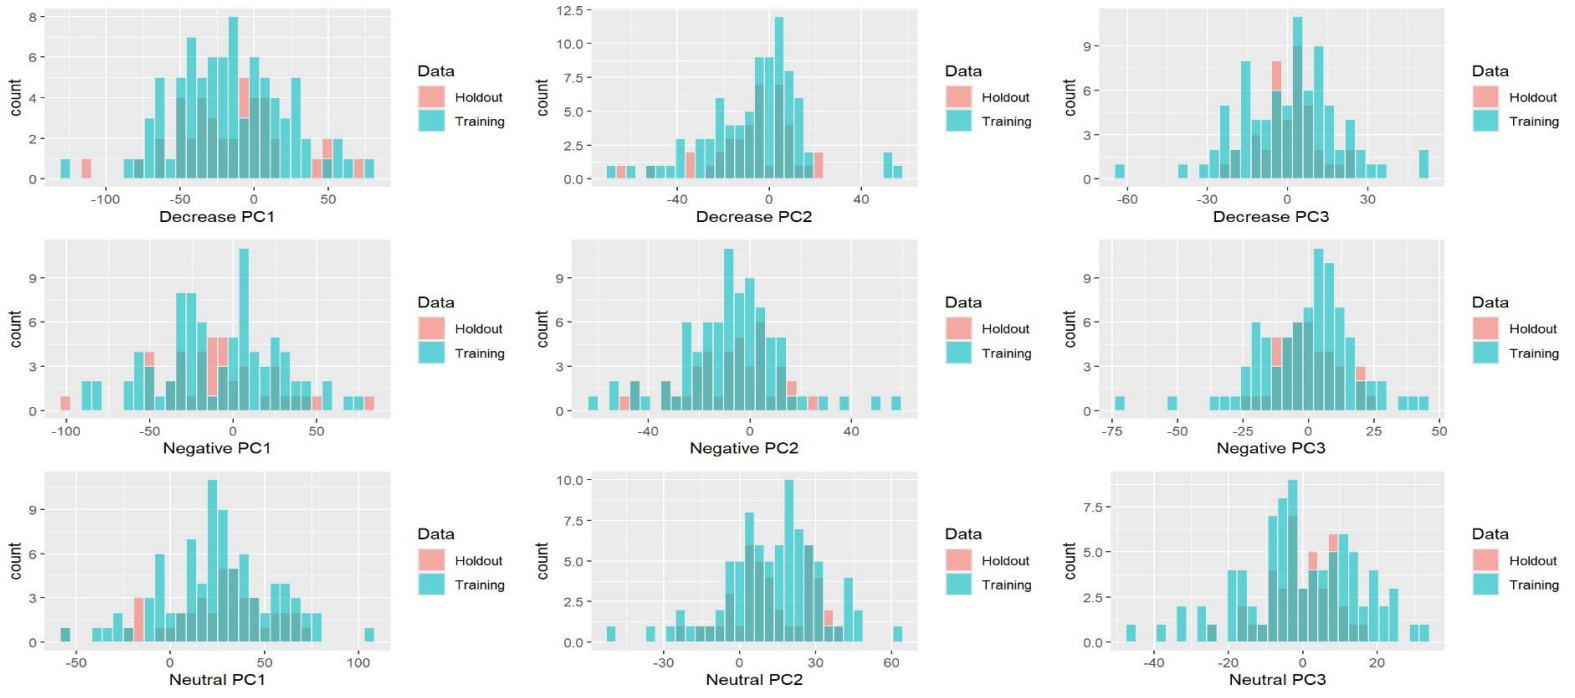

**Figure S2: PC Distributions- Post CovBat**

After CovBat harmonization, distributional differences between the training and holdout samples in the first three principal components are mitigated, with no clear class modulation effect.
